# Supplementary material for: Serious Gaming and Gamification Education in Health Professions: Systematic Review
Source: PubMed Central journal article supplement (PMC6458534; doi:10.2196/12994), 2019-03-28
Supplement: jmir_v21i3e12994_app2.pdf [file jmir_v21i3e12994_app2.pdf]

**Multimedia Appendix 2 Outcome and results of included studies comparing serious gaming/gamification with traditional learning** (see key below table for acronyms)

| <b>Study ID</b>        | <b>Outcome (measurement tool)</b>                                                             | <b>Results (SMD calculated where sufficient data reported or p values, [95% confidence interval])</b> |
|------------------------|-----------------------------------------------------------------------------------------------|-------------------------------------------------------------------------------------------------------|
| <b>Adams 2012</b>      | Skills (peg transfer time)                                                                    | No significant difference between pre- and post-test scores in any group                              |
| <b>Boada 2015</b>      | Skills (CRP lab assessment)                                                                   | Those in the intervention group who completed >50% of tasks vs. control p<0.05                        |
| <b>Boeker 2013</b>     | Knowledge (34 question single choice test)                                                    | SMD 0.69 [0.35, 1.03]                                                                                 |
|                        | Satisfaction (Likert scale)                                                                   | Serious gaming vs. traditional learning p<0.001                                                       |
| <b>Cook 2012</b>       | Skills (assessment of ABCDE approach)                                                         | Significant differences between groups for three of eight measures                                    |
| <b>De Araujo 2016</b>  | Skills (standardized surgical skills exercise)                                                | SMD 2.07 [0.83, 3.31]                                                                                 |
| <b>Del Blanco 2017</b> | Knowledge (participant perceived knowledge measured with a Likert scale)                      | SMD 1.05 [0.68, 1.41]                                                                                 |
|                        | Skills (perceived errors)                                                                     | SMD 0.38, 95% CI 0.04 to 0.73                                                                         |
|                        | Attitudes (fear to make mistakes and attitudes to patients/staff measured with Likert scales) | SMD 0.49 [0.14, 0.84]                                                                                 |

| <b>Study ID</b>       | <b>Outcome (measurement tool)</b>                                                         | <b>Results (SMD calculated where sufficient data reported or p values, [95% confidence interval])</b>                    |
|-----------------------|-------------------------------------------------------------------------------------------|--------------------------------------------------------------------------------------------------------------------------|
| <b>Diehl 2017</b>     | Knowledge (MCQs)                                                                          | SMD 0.40 [0.06, 0.73]                                                                                                    |
|                       | Attitudes (Likert scale)                                                                  | Attitudes improved significantly in 4 out of 9 items in the intervention group and 3 out of 9 items in the control group |
| <b>Foss 2014</b>      | Skills (medication calculation assessment)                                                | Report no significant difference                                                                                         |
| <b>Giannotti 2013</b> | Skill (basic laparoscopic skills assessment on a validated simulator)                     | Statistically significant differences reported for a variety of tasks but not all and no overall measure                 |
| <b>Graafland 2017</b> | Skills (assessment using OSATS on procedures conducted on a live anaesthetized pig model) | Statistically significant difference in total problems solved (p=0.04)                                                   |
| <b>Hannig 2013</b>    | Skills (self-report skills in alginate mixing, mean score for 6 item Likert scale)        | SMD 0.08 [-0.45 to 0.61]                                                                                                 |
| <b>Katz 2017</b>      | Skills (graded on a simulation scenario)                                                  | SMD 0.76, 95% CI 0.11 to 1.40                                                                                            |
|                       | Satisfaction (game group only)                                                            | *                                                                                                                        |
| <b>Knight 2010</b>    | Skills (time to triage in an outdoor gas explosion scenario assessment)                   | SMD -0.18 [-2.37 to 2.02]                                                                                                |
| <b>Lagro 2014</b>     | Knowledge (self-perceived, Likert scale)                                                  | SMD 0.01 [-1.5, 1.61]                                                                                                    |

| <b>Study ID</b>        | <b>Outcome (measurement tool)</b>              | <b>Results (SMD calculated where sufficient data reported or p values, [95% confidence interval])</b>    |
|------------------------|------------------------------------------------|----------------------------------------------------------------------------------------------------------|
|                        | Skills (self-perceived)                        | SMD -0.77 [-2.53, 1.00]                                                                                  |
|                        | Satisfaction (intervention only, Likert scale) | *                                                                                                        |
| <b>LeFlore 2012</b>    | Knowledge (MCQ)                                | SMD 0.65 [0.23, 1.07]                                                                                    |
|                        | Skills (OSCE)                                  | SMD 0.92 [0.49 to 1.35]                                                                                  |
| <b>Li 2015</b>         | Skills (mannequin based assessment)            | Serious gaming vs. control p<0.05                                                                        |
| <b>Plerhoples 2011</b> | Skills (laparoscopic simulation)               | Statistically significant differences reported for a variety of tasks but not all and no overall measure |
| <b>Rondon 2013</b>     | Knowledge (MCQs)                               | SMD 0.05 [-0.74, 0.83]                                                                                   |
| <b>Tan 2016</b>        | Knowledge (MCQs)                               | SMD 1.95 [-0.20 to 4.11]                                                                                 |
|                        | Skills (performance tool)                      | SMD 0.33, 95% [CI -1.19 to 1.86]                                                                         |
|                        | Attitudes (blood transfusion confidence scale) | SMD 1.23 [-0.55, 3.02]                                                                                   |

OSATS = Objective structured assessment of technical skills

OSCE = Objective Structured Clinical Examination

MCQ = Multiple Choice Question

SMD = Standardized mean difference
