# Supplementary material for: Serious Gaming and Gamification Education in Health Professions: Systematic Review
Source: PubMed Central journal article supplement (PMC6458534; doi:10.2196/12994), 2019-03-28
Supplement: jmir_v21i3e12994_app3.pdf [file jmir_v21i3e12994_app3.pdf]

**Multimedia Appendix 3 Outcome and results of included studies comparing serious gaming/gamification with other digital education interventions** (see key below table for acronyms)

| <b>Study ID</b>      | <b>Outcome (measurement tool)</b>                                                 | <b>Results (SMD calculated where sufficient data reported or p values, [95% confidence interval])</b> |
|----------------------|-----------------------------------------------------------------------------------|-------------------------------------------------------------------------------------------------------|
| <b>Amer 2011</b>     | Knowledge (procedural knowledge of resin bonding)                                 | SMD -0.22 [-0.66 to 0.23]                                                                             |
|                      | Skills (dentin shear bond strength)                                               | SMD 0.00 [-0.45, 0.44]                                                                                |
| <b>Chien 2013</b>    | Skills (time taken for peg transfer and bi-manual carrying tasks)                 | SMD -1.56 [-0.31, -12.81]                                                                             |
|                      | Skills (distance travelled for peg transfer and bi-manual carrying tasks)         | SMD 0.96 [-0.17, 2.09]                                                                                |
| <b>Dankbaar 2016</b> | Skills (mannequin based scenario global assessment)                               | SMD -0.15 [-0.66, 0.36]                                                                               |
|                      | Satisfaction (engagement and experience of feedback)                              | P<0.001<br><br>P<0.05                                                                                 |
| <b>Dankbaar 2017</b> | Knowledge (70 MCQs)                                                               | SMD 0.33 [-0.16 to 0.82]                                                                              |
|                      | Skills (self-efficacy for recognition and communication of patient safety issues) | No significant difference between groups                                                              |
|                      | Attitudes (perceived patient safety behavior)                                     | SMD 0.44 [-0.05, 0.92]                                                                                |
|                      | Attitudes (perceived stress)                                                      | SMD -0.22 [-0.70, 0.27]                                                                               |

| <b>Study ID</b>      | <b>Outcome (measurement tool)</b>                                                  | <b>Results (SMD calculated where sufficient data reported or p values, [95% confidence interval])</b> |
|----------------------|------------------------------------------------------------------------------------|-------------------------------------------------------------------------------------------------------|
|                      | Satisfaction (intervention evaluation questionnaire)                               | SG rated significantly better for engagement (p<0.001) and ease of use (p<0.01) but not 'educational' |
| <b>Gauthier 2015</b> | Knowledge (vascular anatomy knowledge test)                                        | SMD 0.24 [-0.34 to 0.82]                                                                              |
| <b>Kerfoot 2014</b>  | Patient outcomes (time to blood pressure control extracted from regional database) | p=0.46<br>(p=0.022 for subgroup already on BP medication)                                             |
|                      | Knowledge (24 clinical scenario based questions)                                   | SMD 0.82 [0.42 to 2.11]                                                                               |
| <b>Sward 2008</b>    | Knowledge (100 item test)                                                          | SMD 0.14 [-0.31 to 0.59]                                                                              |
|                      | Satisfaction (variety of measures)                                                 | Statistically significant difference for some measures but not all                                    |

SMD = Standardized mean difference

BP = Blood pressure
