# Supplementary material for: Serious Gaming and Gamification Education in Health Professions: Systematic Review
Source: PubMed Central journal article supplement (PMC6458534; doi:10.2196/12994), 2019-03-28
Supplement: jmir_v21i3e12994_app4.pdf [file jmir_v21i3e12994_app4.pdf]

**Multimedia Appendix 4 Outcome and results of included studies comparing serious gaming/gamification with another type of serious gaming/gamification intervention** (see key below table for acronyms)

| Study ID           | Outcome (measurement tool)                                                  | Results (SMD calculated where sufficient data reported or p values, [95% confidence interval]) |
|--------------------|-----------------------------------------------------------------------------|------------------------------------------------------------------------------------------------|
| Adams 2012         | Skills (peg transfer time)                                                  | No significant difference between pre- and post-test scores in any group                       |
| De Araujo 2016     | Skills (standardized surgical skills exercise)                              | SMD -0.86 [-2.19, 0.47] (Shot G vs. Surg G)                                                    |
|                    |                                                                             | SMD 0.72 [-0.59, 2.02] (Surg G vs. RaceG)                                                      |
|                    |                                                                             | SMD 1.70 [0.13, 3.27] (Shot G vs. Race G)                                                      |
|                    |                                                                             | SMD 2.07 [0.83, 3.31] (SG vs. traditional)                                                     |
| Hedman 2013/ Kolga | Skills (assessed on a surgical simulator)                                   | FPS superior on a range of measures, but not all                                               |
| Schlickum 2009     | Attitudes (self-efficacy and positive engagement modes)                     | No significant differences                                                                     |
| Ju 2011/12         | Skills (bead transfer time during assessment on laparoscopic box simulator) | SMD 1.54 [0.84, 2.24]                                                                          |
|                    | Skills (suturing score during assessment on laparoscopic box simulator)     | SMD 0.21 [-0.40, 0.82]                                                                         |

|                             |                                                           |                                                                                                               |
|-----------------------------|-----------------------------------------------------------|---------------------------------------------------------------------------------------------------------------|
| <b>Kerfoot 2012</b>         | Knowledge (percentage of game questions scored correctly) | SMD 0.50 [0.38, 0.64]                                                                                         |
| <b>Kolga Schlickum 2008</b> | Skills (assessment on a surgical simulator exercise)      | FPS vs. non-FPS p=0.04                                                                                        |
|                             | Satisfaction                                              | Participant survey reported greater satisfaction in the intervention group, but no significance test reported |

FPS = First person shooter

SMD = Standardized mean difference
